# Supplementary material
Source: publisher figshare collection journal article supplement (https://frontiersin.figshare.com/ndownloader/files/12799901)
Supplement: Supplementary file [file 12799901]

## **Supplementary Information**

### **Extracellular collagen VI has prosurvival and autophagy instructive properties in mouse embryonic fibroblasts**

Silvia Castagnaro, Martina Chrisam, Matilde Cescon, Paola Braghetta, Paolo Grumati, Paolo Bonaldo

Supplementary Figures S1-S6

Supplementary Table S1, S2

# Supplementary Figure S1

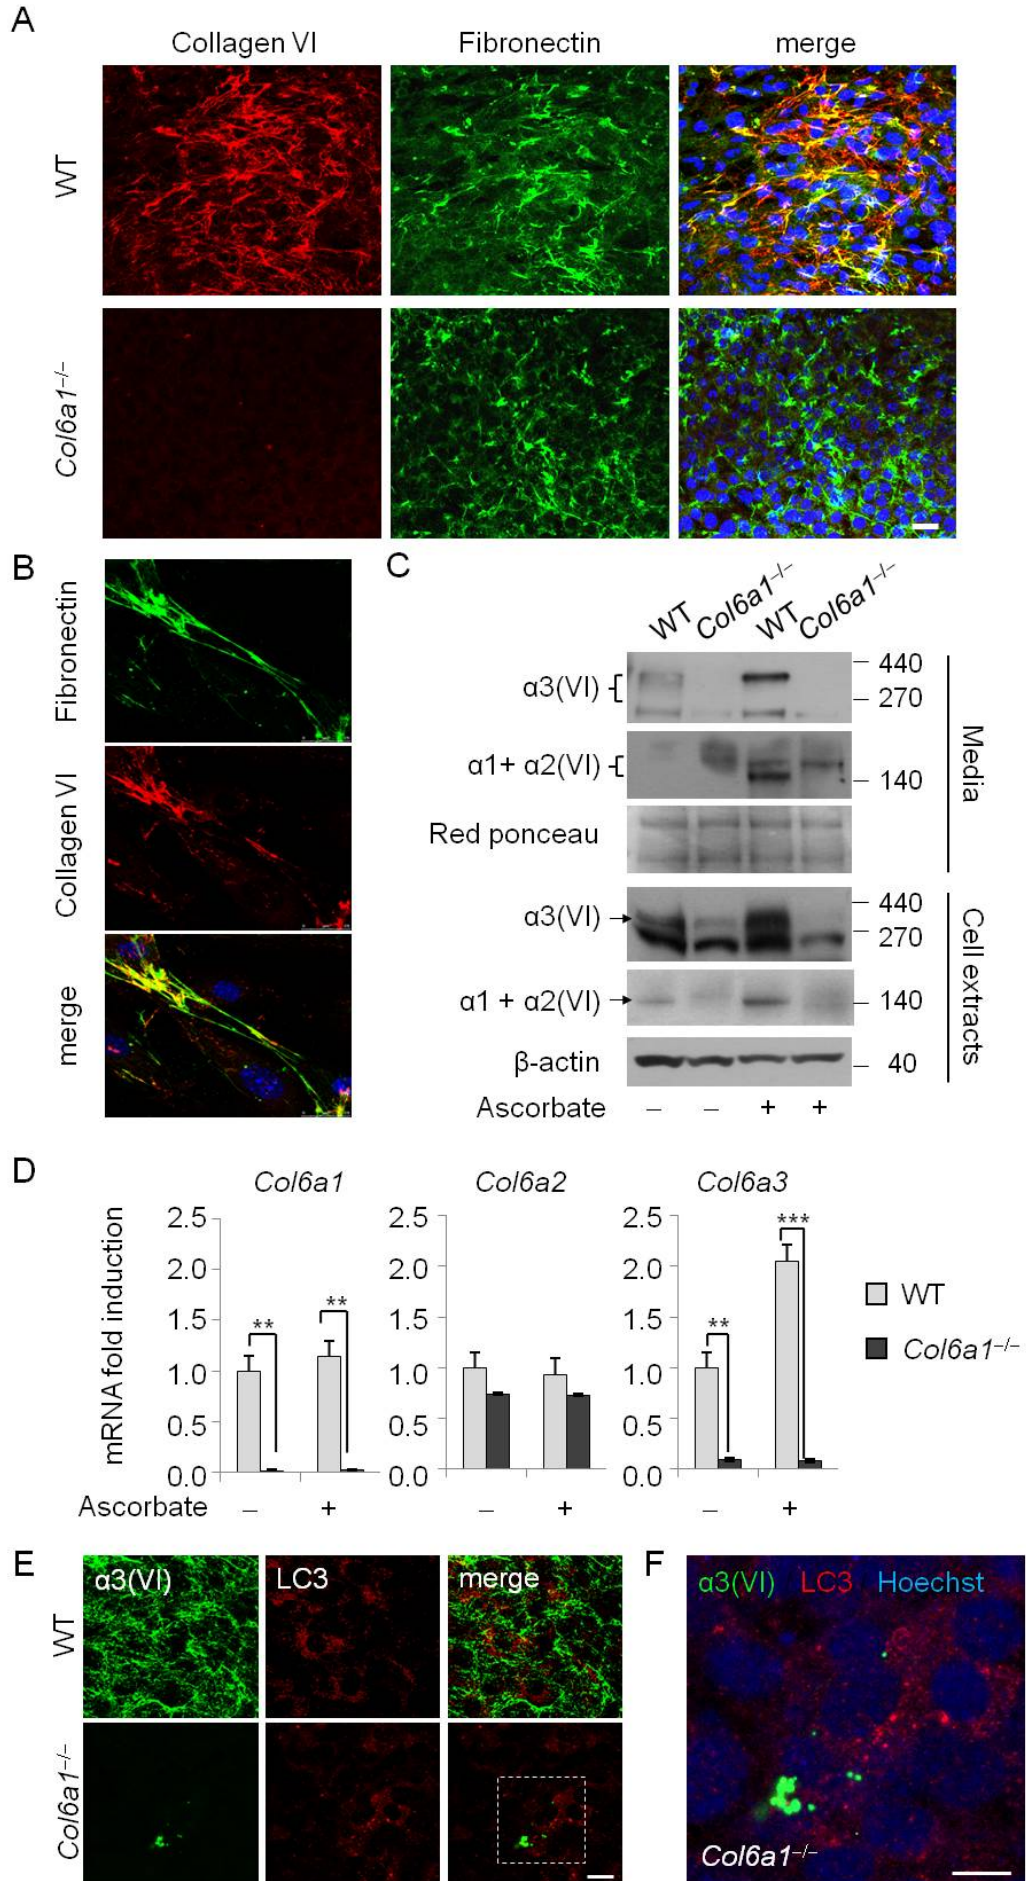

**Supplementary Figure S1. Characterization of ECM deposition and collagen production by immortalized fibroblast cultures derived from wild-type and *Col6a1*<sup>-/-</sup> mice.** (A) Immunofluorescence for ColVI (red) and fibronectin (green) in WT and *Col6a1*<sup>-/-</sup> fibroblast cultures. Scale bar, 25 μm. (B) Confocal microscopy images of ColVI (red) and fibronectin (green) co-immunostaining in WT fibroblasts. Nuclei were stained with Hoechst (blue). Scale bar, 25 μm. (C) Western blot analysis for ColVI chains in culture media and cell extracts from WT and *Col6a1*<sup>-/-</sup> fibroblasts. Where indicated, 0.25 mM ascorbic acid was used to induce ColVI secretion. (D) qRT-PCR analysis of *Col6a1*, *Col6a2* and *Col6a3* mRNA levels in WT and *Col6a1*<sup>-/-</sup> fibroblasts. Data represent the mean of at least three independent experiments. \*\*,  $P < 0.01$ ; \*\*\*,  $P < 0.001$ . (E, F) Co-immunofluorescence staining for α3(VI) chain (green) and LC3 (red) in confluent WT and *Col6a1*<sup>-/-</sup> fibroblasts cultures. A higher magnification of the boxed area is shown in panel F. Intracellular dots of α3(VI) are detected in *Col6a1*<sup>-/-</sup> fibroblasts, with no co-localization with autophagosomes. Nuclei were stained with Hoechst (blue). Scale bars, 20 μm (E) or 10 μm (F).

## Supplementary Figure S2

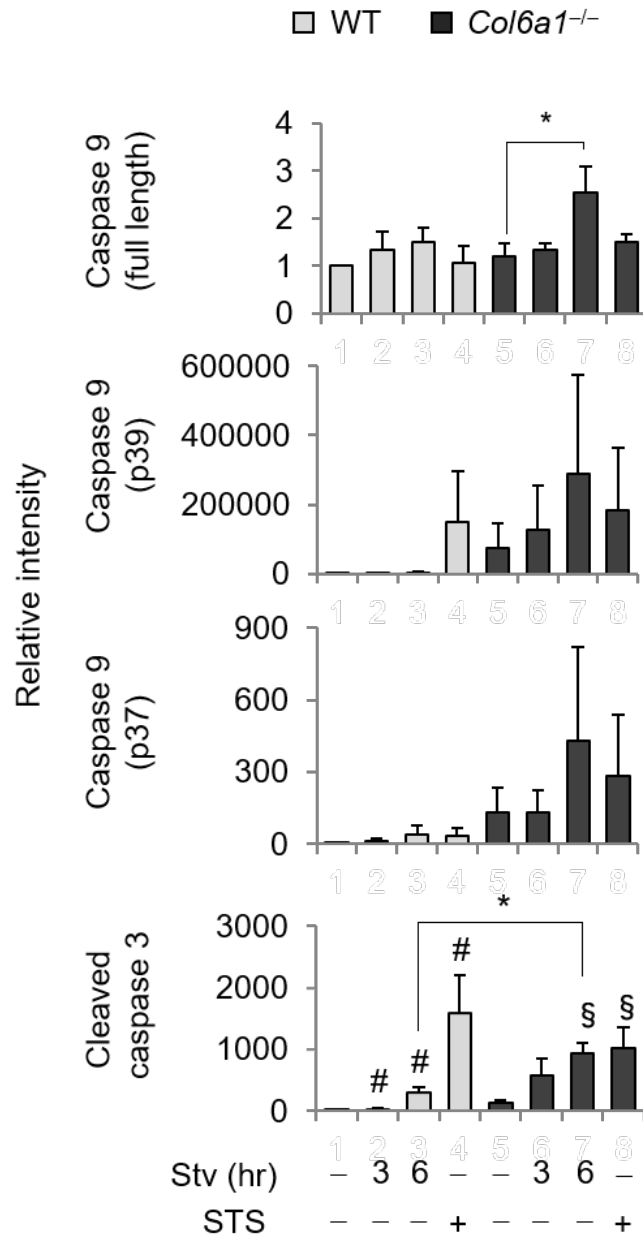

**Supplementary Figure S2. Densitometric quantification of caspases 9 and 3 in WT and *Col6a1*<sup>-/-</sup> fibroblasts in basal, serum-depleted, and staurosporine treated condition.** Histogram showing the relative intensity (on the loading control) of full length caspase 9, p37 and p39 cleaved caspase 9, and cleaved caspase 3, as determined by three independent western blots of total cell extracts from WT and *Col6a1*<sup>-/-</sup> fibroblasts cultured in complete DMEM with 10% serum, or following serum starvation for 3 hr and 6 hr, as in Fig. 1B. \*,  $P < 0.05$ ; #,  $P < 0.05$  for the comparison between WT complete medium and WT no serum; §,  $P < 0.05$  for the comparison between *Col6a1*<sup>-/-</sup> complete medium and *Col6a1*<sup>-/-</sup> no serum. STS, staurosporine; Stv, serum starvation.

### Supplementary Figure S3

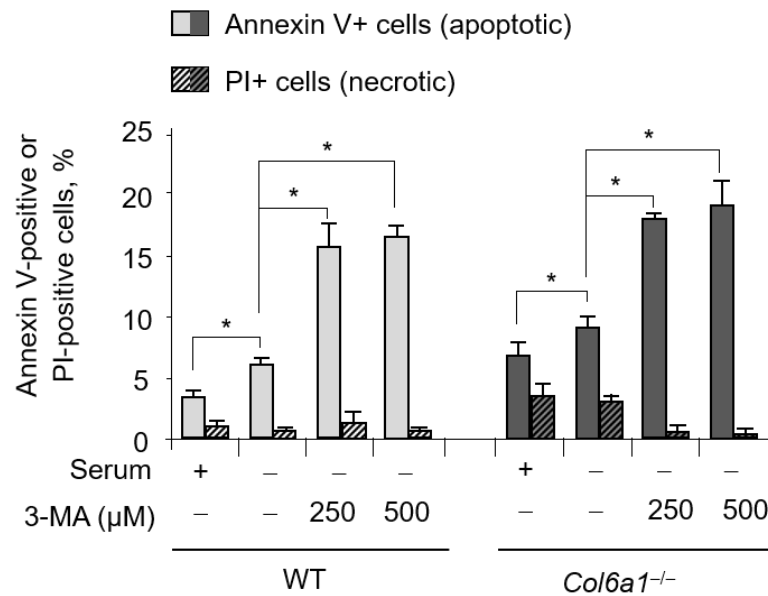

**Supplementary Figure S3. The autophagy inhibitor 3-MA increases apoptosis in a dose-dependent manner in both WT and *Col6a1*<sup>-/-</sup> fibroblasts.** Quantification of annexin V-positive (apoptotic) and PI-positive (necrotic) cells, as determined by flow cytometry analysis of annexin V and PI in WT and *Col6a1*<sup>-/-</sup> fibroblasts cultured for two days in complete medium (Serum+) or following serum starvation conditions for 3 hr (Serum-), in the absence or presence of 3-MA at the indicated concentrations. Data represent the mean of at least three independent experiments. \*,  $P < 0.05$ .

### Supplementary Figure S4

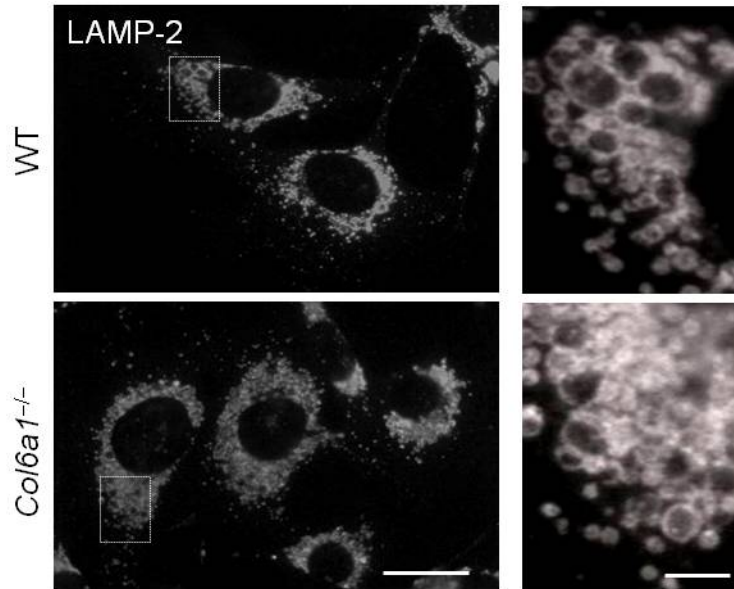

**Supplementary Figure S4. CQ treatment induces lysosome swelling in fibroblasts.**

Immunofluorescence for LAMP-2, showing similar immunostaining in WT and *Col6a1*<sup>-/-</sup> fibroblasts after 50 μM CQ treatment. The right panels show a higher magnification of the boxed area of the respective left panels, with a detailed view of perinuclear swollen lysosomes. Scale bars, 25 μm (left panels) and 5 μm (right panels).

### Supplementary Figure S5

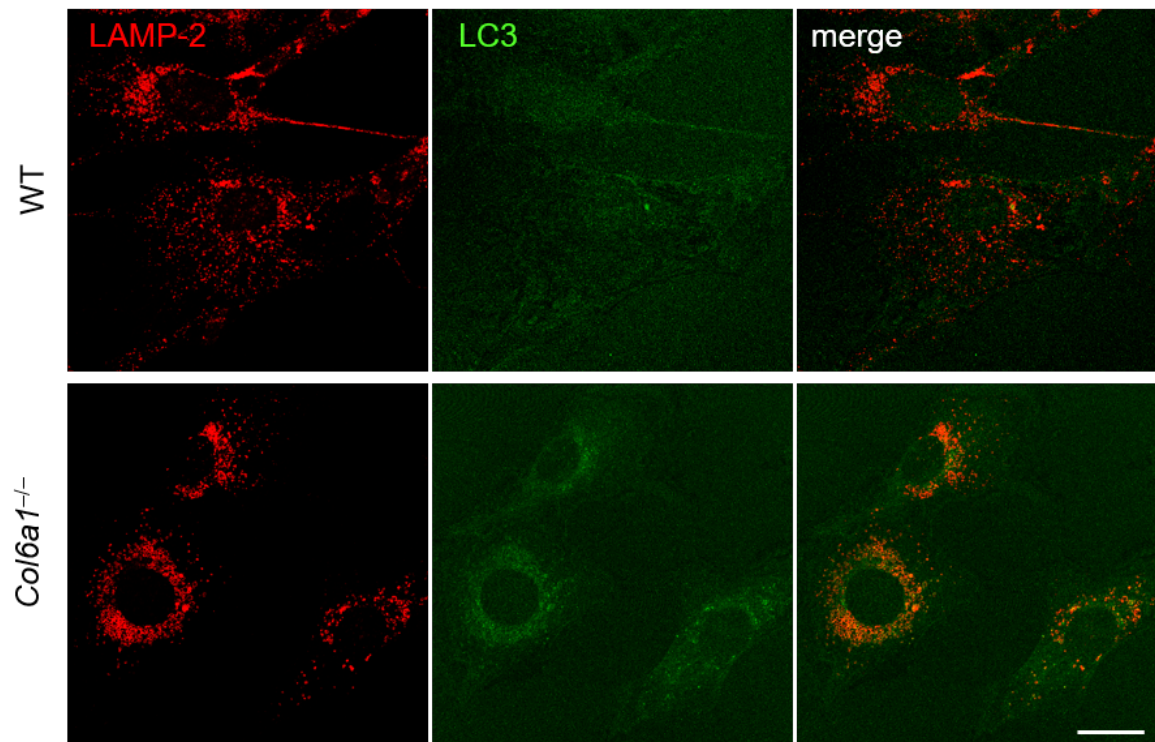

**Supplementary Figure S5. Co-localization analysis of autophagosome and lysosomes in WT and *Col6a1*<sup>-/-</sup> fibroblasts.** Co-immunostaining for LC3 (autophagosome marker) and LAMP-2 (lysosome marker) in WT and *Col6a1*<sup>-/-</sup> fibroblasts cultured in complete medium. Scale bar, 25  $\mu$ m.



## Supplementary Figure S6

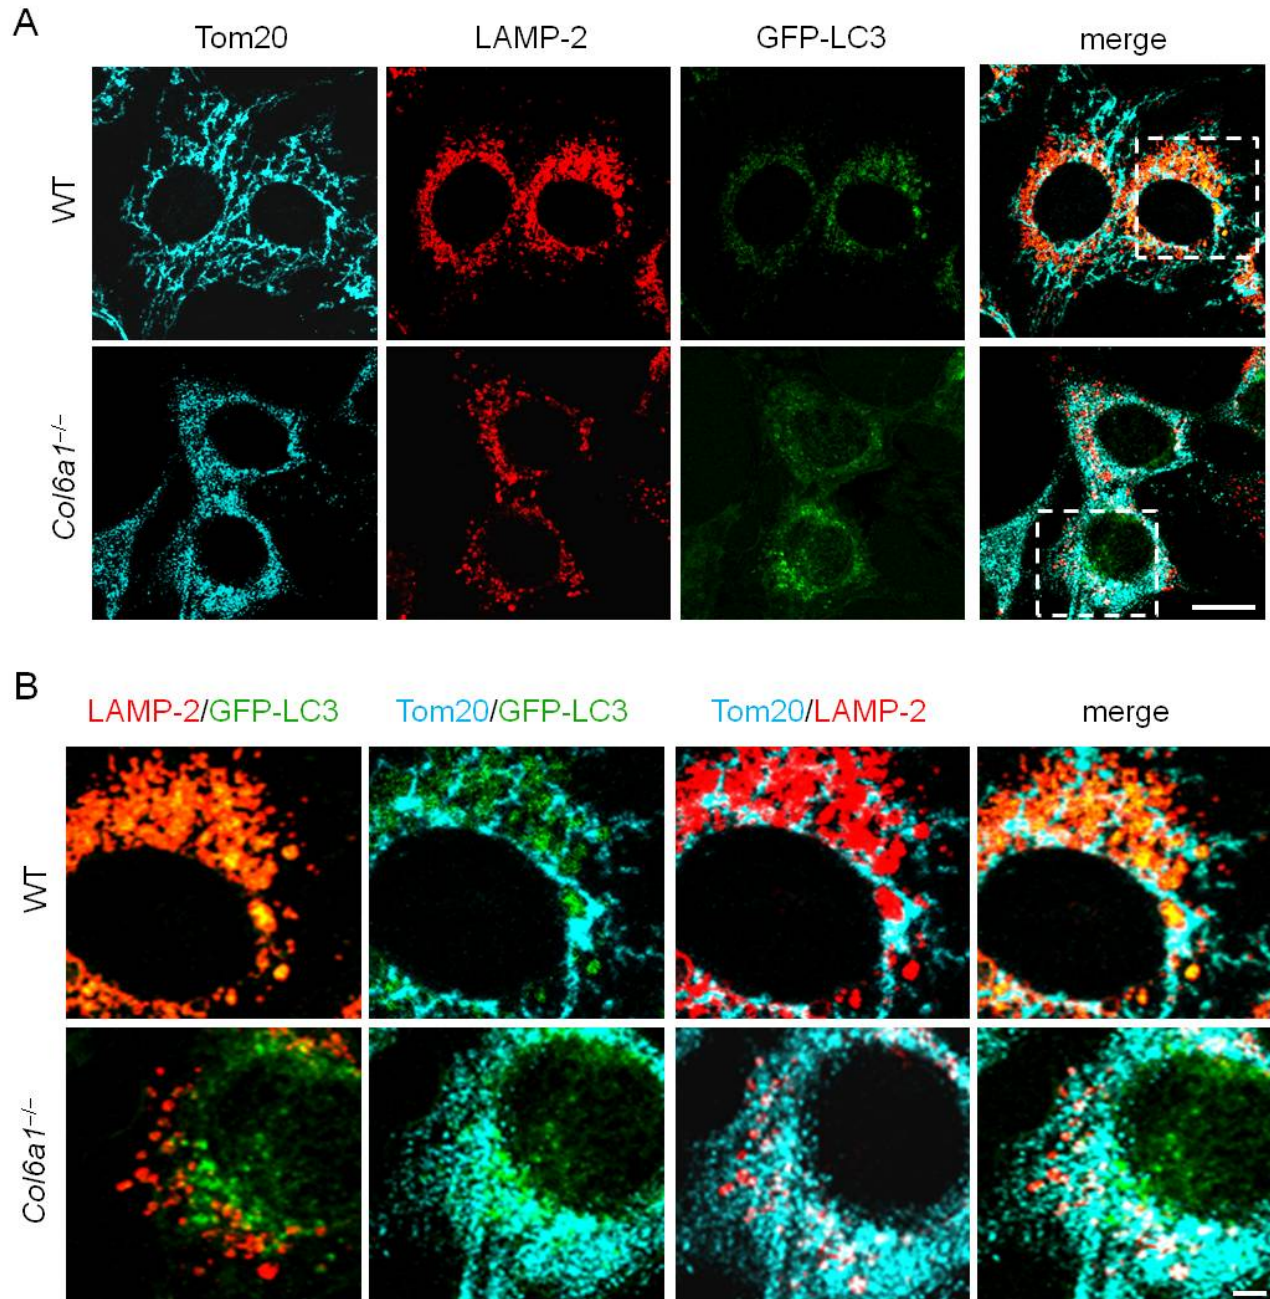

**Supplementary Figure S6. Co-localization analysis of mitochondria, autophagosomes and lysosomes in WT and *Col6a1*<sup>-/-</sup> fibroblasts.** (A) Immunofluorescence for Tom20 (mitochondria, cyan) and LAMP-2 (lysosomes, red) in *Col6a1*<sup>+/+</sup>::GFP-LC3 (WT) and *Col6a1*<sup>-/-</sup>::GFP-LC3 (*Col6a1*<sup>-/-</sup>) fibroblasts cultured for two days and subjected to serum starvation for 3 hr. Scale bar, 25  $\mu$ m. (B) Higher magnification details of the dotted areas shown in the merge images of panel A. Color codes are indicated on the top. *Col6a1*<sup>-/-</sup> fibroblasts display increased co-localization of fragmented mitochondria (cyan) with autophagosomes (green) and lysosomes (red). Scale bar, 25  $\mu$ m.



**Supplementary Table S1. Primers used for the qRT-PCR.**

|                 | <b>Forward primer (5' &gt; 3')</b> | <b>Reverse primer (5' &gt; 3')</b> |
|-----------------|------------------------------------|------------------------------------|
| <i>Col6a1</i>   | TGCCCTGTGGATCTATTCTTCG             | CTGTCTCTCAGGTTGTCAATG              |
| <i>Col6a2</i>   | CAACCGCATCATCAAGGTCA               | GGGTCTCCCTGTCGTCCTTT               |
| <i>Col6a3</i>   | AACCCTCCACATACTGCTAATTC            | TCGTTGTCACTGGCTTCATT               |
| <i>Map1lc3b</i> | CACTGCTCTGTCTTGTGTAGGTTG           | TCGTTGTGCCTTTATTAGTGCATC           |
| <i>Sqstm1</i>   | CCCAGTGTCTTGGCATTCTT               | AGGGAAAGCAGAGGAAGCTC               |
| <i>Becn1</i>    | TGAATGAGGATGACAGTGAGCA             | CACCTGGTTCTCCACACTCTTG             |
| <i>Bnip3</i>    | TTCCACTAGCACCTTCTGATGA             | GAACACCGCATTTACAGAACAA             |
| <i>Lamp2</i>    | CAAAAGGACAGTATTCTACAGCTCA          | CCACCGCTATGGGCACAA                 |
| <i>Tfeb</i>     | TCAGAAGCGAGAGCTAACAGAT             | TGTGATTGTCTTTCTTCTGCCG             |
| <i>Lamp1</i>    | AGTGGGAGTTGCGGTATCAAC              | TGGAGATGCTGAATGTGGGC               |
| <i>Atg14</i>    | GCAGGTCAGGACCCTTTGAA               | TCCTCATCGCTTACACGCTC               |
| <i>Uvrag</i>    | CATCGCTGCTCGGAACATTG               | CCTCCACGTCGGATTCAAGG               |
| <i>Gapdh</i>    | CACCATCTTCCAGGAGCGAG               | CCTTCTCCATGGTGGTGAAGAC             |

**Supplementary Table S2. Antibody list.**

| <b>Antibody</b>             | <b>Working dilution</b> | <b>Source</b>                             |
|-----------------------------|-------------------------|-------------------------------------------|
| Akt                         | 1:1000                  | 9272, Cell Signaling Technologies         |
| phospho-Akt                 | 1:1000                  | 4058, 4060, Cell Signaling Technologies   |
| AMPK                        | 1:1000                  | 2532, Cell Signaling Technologies         |
| phospho-AMPK                | 1:1000                  | 4188, Cell Signaling Technologies         |
| $\beta$ -actin              | 1:5000                  | A 5316, Sigma-Aldrich                     |
| Caspase 3                   | 1:1000                  | 9661, Cell Signaling Technologies         |
| Caspase 9                   | 1:1000                  | 9504, Cell Signaling Technologies         |
| Collagen VI, $\alpha$ 1(VI) | 1:300 (IF); 1:1000 (WB) | H-200, sc-20649, Santa Cruz Biotechnology |
| Erk1/2                      | 1:1000                  | 9102, Cell Signaling Technologies         |
| phospho-Erk1/2              | 1:1000                  | 4377, Cell Signaling Technologies         |
| LAMP-2                      | 1:200 (IF); 1:500 (WB)  | GL2A7, ab13524 Abcam                      |
| LC3B                        | 1:1000 (WB)             | PA1-16930, Thermo Scientific              |
| LC3B                        | 1:200 (IF); 1:1000 (WB) | 2775, Cell Signaling Technologies         |
| p62                         | 1:5000 (WB)             | GP62-C, Progen                            |
| p62                         | 1:5000 (WB)             | PM045, MBL                                |
| rpS6                        | 1:1000                  | 2217, Cell Signaling Technologies         |
| phospho-rpS6                | 1:1000                  | 5364, Cell Signaling Technologies         |
| Tom20                       | 1:200                   | sc-11415, Santa Cruz Biotechnology        |
| 4E-BP1                      | 1:1000                  | 9452, Cell Signaling Technologies         |
| phospho-4E-BP1              | 1:1000                  | 2855, Cell Signaling Technologies         |
| Ulk1                        | 1:1000                  | 4773, Cell Signaling Technologies         |
| phospho-Ulk1<br>(Ser555)    | 1:1000                  | 5869, Cell Signaling Technologies         |
| phospho-Ulk1<br>(Ser757)    | 1:1000                  | 6888, Cell Signaling Technologies         |
| Raptor                      | 1:1000                  | 2280, Cell Signaling Technologies         |
| phospho-Raptor              | 1:1000                  | 2083, Cell Signaling Technologies         |

IF, immunofluorescence; WB, western blot.
